1           **Differential effects of multiplex and uniplex affiliative relationships on**  
2                                                           **biomarkers of inflammation**

3   **Jessica Vandeleest<sup>1\*</sup>, Lauren J. Wooddell<sup>2</sup>, Amy C. Nathman<sup>1</sup>, Brianne A. Beisner<sup>3</sup>, Brenda**  
4                                                           **McCowan<sup>1</sup>**

5   <sup>1</sup>California National Primate Research Center, University of California, Davis, CA, United States

6                                                           <sup>2</sup>Department of Neurosurgery, Emory university, Atlanta, GA

7                                                           <sup>3</sup>Emory National Primate Research Center Field Station, Lawrenceville, GA, United States

8  
9                                                           \*Corresponding author details: Jessica Vandeleest, PhD

10                                                           Email: vandeleee@ucdavis.edu

11  
12  
13  
14  
15  
16  
17  
18  
19  
20  
21

22

## 23 **Abstract**

24           Social relationships profoundly impact health in social species. Much of what we know  
25 regarding the impact of affiliative social relationships on health in nonhuman primates (NHPs)  
26 has focused on the structure of connections or the quality of relationships. The influence of  
27 relationship dimensionality (e.g., the breadth of affiliative behaviors used) on health and fitness  
28 outcomes remains unknown. Here we explored how social networks containing dyads with either  
29 multiplex (dyads both groom and huddle) or uniplex (dyads only groom) affiliative relationships  
30 differ in their structure and association with biomarkers of inflammation, an indicator of  
31 individual health risk. Being strongly embedded in multiplex affiliative networks, which were  
32 more modular and kin biased, was associated with lower inflammation (IL-6, TNF-alpha). In  
33 contrast, being well connected in uniplex networks, which were more strongly linked with social  
34 status, was associated with greater inflammation. Results suggest that multiplex affiliative  
35 relationships may function as supportive relationships that promote health. In contrast, the  
36 function of uniplex affiliative relationships may be more transactional and may incur  
37 physiological costs. This complexity is important to consider for understanding the mechanisms  
38 underlying the association of social relationships on human and animal health.

39

40 **Keywords:** affiliation, *Macaca mulatta*, cytokines, inflammation

41

## 42 **Introduction**

43 For decades, research has shown that social relationships impact individual health and  
44 fitness with estimates of the magnitude of the association with mortality on par with other well  
45 recognized mortality risks (e.g., smoking, alcohol consumption, obesity)<sup>1</sup>. Researchers often  
46 distinguish between structural (quantity and structure) versus functional (quality or function)  
47 measures of social relationships, and while only moderately correlated ( $r = 0.2-0.3$ ) both high  
48 quantity and quality of relationships have been associated with better health outcomes<sup>1,2</sup>.  
49 Notably, multidimensional measures (i.e., those that assess multiple aspects of social  
50 connections) often are the strongest predictors of health and fitness<sup>1-3</sup>. While structural measures  
51 of social relationships (number of social partners) are typically straightforward for both human  
52 and animal societies, functional measures of social relationships are more feasible and thus  
53 common for humans (e.g., measures of perceived social support), whereas determining the  
54 function of social relationships in animals is much more complicated.

55 Quantitative measures of the structure of affiliative social relationships are often simple  
56 to calculate and include the number of social partners, the frequency of interactions, or the higher  
57 order structuring of social relationships using social network analysis. While some studies find  
58 that the total number of social connections or the total amount of affiliation are associated with  
59 survival and reproductive outcomes, others find that only *certain* relationships (e.g., animals:  
60 strong and stable social bonds; humans: family and friends ) impact health and fitness<sup>1,2,4-9</sup>.  
61 Social network analysis is often used to examine how structural features of social life or an  
62 individual's role in their broader social network or community may impact their health and  
63 wellbeing. Commonly used network centrality metrics include eigenvector, betweenness, and  
64 closeness which reflect the degree to which an individual has social capital, acts as a bridge

65 between others, and is embedded in the network, respectively. Less commonly investigated is  
66 the impact of clustering or transitivity (the degree to which your connections are connected to  
67 each other) a measure of subgrouping and the degree to which individual form cohesive  
68 “cliques”<sup>10</sup>. While the general pattern seen across these measures is that greater connectedness  
69 or centrality is associated with lower risk for gastrointestinal pathogens, increased reproduction  
70 and longevity<sup>4,10–12</sup>, there is little consistency across studies in identifying which specific social  
71 role or network metric is important and some studies find no impact of social network position  
72 on fitness<sup>2,4,6</sup>.

73         Measuring the function of social relationships attempts to examine what purpose or role a  
74 relationship serves and whether it meets the needs of the individual. In humans, functional  
75 measures of social relationships include surveys of perceived social support, informational  
76 support, emotional support, and tangible support. Assessing functions of different relationships  
77 is far more challenging in animals due to the fact we cannot ask animals the value or perceptions  
78 of their relationships. Instead, research on social relationships in animals has more often relied  
79 on metrics designed to indirectly assess the quality rather than directly query the function of  
80 relationships. A commonly used metric to assess the quality of affiliative social relationships is  
81 the dyadic sociality index (DSI) which incorporates information from multiple, correlated  
82 affiliative behaviors (e.g., grooming and proximity). Relationships with high DSI scores are  
83 commonly referred to as strong bonds and tend to be equitable, stable, involve frequent  
84 interaction and are most common between kin and peers<sup>4,13,14</sup>. Higher number or quality of these  
85 strong bonds has been associated with acute hormonal responses (e.g., oxytocin or cortisol  
86 levels), increased reproduction, and survival<sup>4,6,7,15</sup>. While the positive association between strong  
87 bonds and increased reproduction and survival are well supported (although see<sup>16</sup>), the strength

88 of affiliative bonds is often skewed with strong affiliative bonds making up only a small fraction  
89 of affiliative relationships an individual has<sup>7,13,17–19</sup>. The function of these other, weaker bonds  
90 has been hypothesized to be increased social flexibility (e.g., social connections can shift with  
91 environmental demands), with general social integration and indirect connections providing  
92 access to others that may have resources or information<sup>4,17</sup>. However, evidence for an  
93 association between weak bonds and health and fitness is mixed<sup>7,17</sup>. While useful, the dichotomy  
94 of strong and weak bonds does not fully characterize these relationships and their potential  
95 functions. Hinde<sup>20</sup> points out that “affection is multidimensional and cannot be assessed along a  
96 simple scale...” (p. 13). We know that both structural and functional aspects of social  
97 relationships are key to understanding their impacts on health in humans. Therefore, to better  
98 understand the mechanisms by which these relationships impact health and fitness in animals we  
99 need additional tools to characterize social relationships.

100       Recent advances in social network analysis and theory, and specifically multiplex  
101 networks, may provide tools to help disentangle the impact of structural and functional social  
102 relationships. Most studies of animal affiliation either analyze behaviors separately (e.g.,  
103 grooming or proximity) or lump affiliative behaviors together giving them roughly equal  
104 weight<sup>4,21</sup>. However, such practices may overlook key information in the diversity or breadth of  
105 affiliative interactions in which a dyad engages<sup>20,21</sup>. Evidence for the importance of  
106 multidimensionality in social relationships can be found in a study by Balasubramaniam and  
107 colleagues<sup>11</sup> in which they found that highly connected rhesus macaques (i.e., high outdegree or  
108 eigenvector) in a grooming network were less likely to have *Shigella*, a gastrointestinal  
109 pathogen, but only if they were also well connected in a huddling network (i.e., high  
110 betweenness). This finding lends support to the idea that the breadth or diversity of affiliative

111 behaviors a dyad engages in might provide important information as to the nature of that  
112 relationship and its potential impacts on health and fitness<sup>11</sup>. Therefore to understand the impact  
113 of social relationships on individual health and fitness, we must examine the cumulative impact  
114 of an individual's diversity and breadth of social relationships to really understand their potential  
115 influence on health<sup>22,23</sup>. Social network approaches provide an important tool to aid in bridging  
116 the gap between these different levels of analysis: from interactions, to relationships, to an  
117 individual's place in a social structure and may be uniquely suited to assessing the cumulative  
118 impact of social relationships on individual functioning.

119       Here we used social network analysis to explore whether behavioral diversity within a  
120 relationship can allow for understanding of the potential function of those relationships and their  
121 impact on health-related outcomes. Affiliation in primates takes many forms, including  
122 grooming, huddling, proximity, embracing, and less commonly coalitionary support<sup>43-45</sup>. In  
123 macaques, grooming is commonly used to indicate the presence of an affiliative relationship<sup>41,46</sup>.  
124 Grooming has been proposed to serve multiple social functions including: to maintain social  
125 bonds<sup>46</sup> and social cohesion<sup>47</sup>, and in exchange for tolerance from dominants, for agonistic  
126 support, or for access to resources<sup>48-50</sup>. Although less commonly studied, huddling behavior may  
127 also be an important indicator of strong affiliative relationships<sup>51</sup>, particularly those that may  
128 offer social buffering<sup>11</sup>. Therefore, we generated networks consisting of dyads with multiplex  
129 (i.e., dyads both groomed and huddled) vs. uniplex (i.e., dyads that only groomed) affiliative  
130 relationships and examined whether they differed in their network structure in ways that might  
131 allow us to infer their potential function (e.g., social bonding and cohesion or exchange for  
132 tolerance and resources). The structure of the resulting networks was then examined in relation  
133 to key structural features of rhesus relationships including: modularity (i.e., degree of clustering),

134 associations with kinship, and associations with rank<sup>46,47</sup>. Next, we determined whether the  
135 structure of connections in multiplex and uniplex affiliative networks were associated with  
136 biomarkers of inflammation (i.e., serum pro-inflammatory cytokines), an indicator of individual  
137 health status. Chronic inflammation is associated with for a variety of diseases (e.g., diabetes,  
138 cardiovascular disease, cancer) and mortality<sup>24-26</sup>. We measured two pro-inflammatory  
139 cytokines, IL-6 and TNF- $\alpha$ , as biomarkers of general inflammation. High levels of these pro-  
140 inflammatory cytokines and have previously been reported to be associated with social variables  
141 (e.g., low social status, low social integration, poor quality relationships, loneliness) in humans  
142 and rhesus macaques<sup>22,27-30</sup>.

## 143 **Materials and Methods**

### 144 **Subjects and housing**

145 Subjects were 248 breeding age (3 years and older) female rhesus macaques (*Macaca*  
146 *mulatta*) that were born at the California National Primate Research Center in Davis, California  
147 (Table 1). Subjects lived in one of four large multigenerational and matrilineal social groups  
148 containing 100-200 mixed-sex individuals (Table 1), each housed in a 0.2 hectare outdoor  
149 enclosure. Subjects were fed commercial monkey chow and foraging enrichment twice daily.  
150 Fruits or vegetables were provided weekly. Water was available ad libitum.

151 **Table 1: Group Demographics**

152

| <b>Group</b> | <b>Group size (adults)</b> | <b>N (adult females)</b> | <b># of Matrilines<sup>a</sup></b> | <b>Mean Matriline size (SD)</b> |
|--------------|----------------------------|--------------------------|------------------------------------|---------------------------------|
| Group A      | 131 (101)                  | 74                       | 13                                 | 5.7 (3.6)                       |
| Group B      | 204 (101)                  | 67                       | 33                                 | 2.0 (1.0)                       |
| Group C      | 125 (55)                   | 39                       | 6                                  | 6.5 (3.9)                       |
| Group D      | 185 (96)                   | 68                       | 13                                 | 5.2 (2.3)                       |

160 <sup>a</sup> Number of matrilines and matriline size statistics include only breeding age females.  
161 Individuals were considered part of the same matriline if they could be traced back to the same  
162 female genetic common ancestor at the time of group formation.

163  
164 Rhesus macaques live in large multi-male, multi-female social groups organized by rank  
165 and kinship<sup>31</sup>. For females, rank is inherited from their mothers and generally all members of a  
166 matriline hold adjacent ranks<sup>32</sup> (although see<sup>33</sup>). In contrast, males generally immigrate into a  
167 new social group and may enter at the bottom of the hierarchy, queueing for rank, or attain rank  
168 through direct competition<sup>34</sup>. Rhesus macaque females form the core of the social group with  
169 affiliation between both kin and non-kin playing a key role in maintaining group stability<sup>31,35</sup>.  
170 Although male social bonds have important fitness outcomes in macaques generally<sup>36</sup>, male  
171 rhesus macaques engage in social affiliation far less frequently<sup>37</sup> and tend to be more socially  
172 isolated than females<sup>38</sup>. Therefore, we focus our analysis on females, which we predict will be  
173 more strongly impacted by social bonds than males. We use rhesus macaques as a group-living,  
174 nonhuman primate (NHP) model because their social relationships are highly differentiated,  
175 exhibit a high degree of complexity and individual variability, and have been linked to a variety  
176 of health and fitness outcomes<sup>22,30,39,40</sup>.

### 177 **Behavioral data collection**

178 Subjects were part of a larger study on the associations between social networks and  
179 health. Groups A and B were studied for six continuous weeks during the birthing season from  
180 March to April 2013 and 2014, respectively. Groups C and D were studied for six continuous  
181 weeks during the breeding season from September to October 2013 and 2014, respectively.  
182 Behavioral data were collected six hours per day, four days per week from 0900-1200 and 1300-  
183 1600 each day by one of three observers (inter-rater reliability, Krippendorff's  $\alpha \geq 0.85$ ).  
184 Affiliative behavior was collected via scan sampling every 20-minutes (maximum 18 scans per  
185 day), where identities of all adult female dyads affiliating (i.e. grooming or huddling) were  
186 recorded<sup>11</sup>. Grooming was defined as cleaning or manipulating the fur of another animal and



187 huddling included all forms of body contact, including (but not restricted to) ventral contact,  
188 embrace, or side by side sitting. During each scan, these behaviors were mutually exclusive for a  
189 dyad (an individual grooming another was not also huddling that individual). Affiliation scans  
190 produced 1637 scans (Group A: N=418, Group B: N=410, Group C: N=378, Group D: N=431)  
191 and an average of 20.1 grooming interactions per female (group range 12.8 – 25.6) and 15.65  
192 huddling interactions (group range 7.8-26.9). This sampling scheme has been shown to produce  
193 sufficiently sampled grooming and huddling networks<sup>41</sup>. Aggression data (threats, chases, bites)  
194 were also collected via an event sampling protocol for six hours per day, four days per week by  
195 two other observers (average of 42.5 interactions per individual, group range 36.2 – 51.9).  
196 Because social status has been shown to impact inflammation<sup>39</sup> (although see<sup>22</sup>), dyadic  
197 aggression data was used to calculate dominance ranks and dominance certainty via the R  
198 package *Perc*<sup>22,42</sup>. Dominance rank was expressed as the percent of animals in the group  
199 outranked and therefore ranged from 0 (low) to 1 (high).

## 200 **Affiliative network analysis**

201 Huddling behavior was used to filter edges in the grooming network into two affiliative  
202 networks; a network containing edges for dyads that both groomed and huddled at some point  
203 during the 6-week study (multiplex affiliative relationships) and a network containing edges for  
204 dyads that groomed but were never seen huddling (uniplex affiliative relationships). Edge-  
205 weights in both networks reflected only the number of times that dyad was observed grooming  
206 (Table S1). For each network, centrality and cohesion measures for each individual were  
207 calculated in Cytoscape 3.7.1 using two plug-ins, NetworkAnalyzer and CytoNCA<sup>52,53</sup>. For all  
208 metrics, both unweighted and weighted metrics were evaluated; unweighted metrics evaluated  
209 the importance of who individuals were connected to regardless of how often they interacted

210 while weighted metrics evaluated whether the frequency with which animals interacted was  
211 relevant. The effects of the direct connections for individuals were measured using degree  
212 centrality. The effect of an individual's indirect connections in the network was evaluated using  
213 eigenvector, betweenness, information, and closeness centralities<sup>4,10,11</sup>. In addition, the degree to  
214 which individuals were part of cohesive local communities was measured by the local clustering  
215 coefficient (i.e., triadic closure). Multiple metrics were chosen to reflect the different ways social  
216 integration can manifest (e.g., bridging, cohesion, embeddedness, etc. Table 2).

## 217 **Table 2: Network Metric Definitions**

218 <sup>a</sup> Both weighted and unweighted metrics were used.

| Measure                  | Description                                                                                                                                                                                                            |
|--------------------------|------------------------------------------------------------------------------------------------------------------------------------------------------------------------------------------------------------------------|
| Degree                   | measures the <i>number</i> (unweighted) of partners or <i>frequency</i> of interaction (weighted) for each node.                                                                                                       |
| Eigenvector <sup>a</sup> | measures whether individuals are well connected to others that are also well connected, a measure of <i>social capital</i> .                                                                                           |
| Betweenness <sup>a</sup> | measures the number of times a node lies on the shortest path between other nodes, which reflects an individual's role in connecting others in the network or acting as a <i>social bridge</i> .                       |
| Information <sup>a</sup> | measures the number of times a node lies on <i>any</i> path between other nodes, which reflects an individual's role as a social bridge between many others. Reflects an individual's role in <i>social cohesion</i> . |
| Closeness <sup>a</sup>   | measures how close each node is to all other nodes within the network, which reflects how <i>embedded</i> an individual is in the network                                                                              |
| Clustering Coefficient   | measures the extent to which a node's neighbors are also connected to each other, a measure of <i>cliquishness</i> .                                                                                                   |

219

## 220 **Biological sample collection**

221 Blood samples were taken during the fifth week of each group's study period during  
222 routine, semi-annual health checks. On a single morning, all animals in a group were lightly  
223 sedated with ketamine (10 mg/kg) and given veterinary exams. Blood samples were obtained  
224 from the femoral vein and serum was aliquoted and stored at -80 °C for later assay. The order in  
225 which animals were processed and samples were collected was recorded to control for any  
226 potential impacts of the sampling procedure on the physiological variables examined.

## 227 **Pro-inflammatory Cytokine Assay**

228           Serum levels of IL-6 and TNF- $\alpha$  were measured simultaneously using commercially  
229 available, species specific Milliplex multi-analyte profiling (MAP) reagents purchased from  
230 EMD/Millipore (Billerica, MA, USA), and utilizing Luminex Xmap technology (Luminex,  
231 Austin, TX, USA). Color coded polystyrene microbeads coated with specific antibodies for IL-6  
232 and TNF- $\alpha$  were incubated with the serum samples, washed, and then further reacted with  
233 biotinylated detector antibodies followed by Streptavidin-PE to label the immune complexes on  
234 the beads. After a final washing to remove all unbound material, the beads were interrogated in a  
235 BioPlex dual laser (BioRad, Hercules, CA, USA). The median fluorescent index for each sample  
236 was compared to a standard curve to calculate the concentration (IL-6: mean = 12.55 pg/mL, sd  
237 = 46.92, range = 0 – 690; TNF- $\alpha$ : mean = 185.0 pg/mL, sd = 442.27, range = 0 – 4052; see  
238 Figure S2 for histograms). Samples were tested in duplicate and had an intra-assay coefficient of  
239 variability of 15.3%. Samples were re-analyzed if the CV was greater than 25% for all analytes  
240 measured. Manufacturer provided quality control samples fell within recommended ranges for all  
241 assays. Samples falling below the threshold sensitivity of the assay (1.6 pg/mL) were assigned a  
242 value of zero (IL-6: N = 76, TNF- $\alpha$ : N = 53).

## 243 **Statistical analysis**

244           Two sets of analyses were done to determine whether 1) multiplex and uniplex affiliation  
245 networks differ in structure and relationships to known social features of rhesus macaques (e.g.,  
246 kin bias, hierarchical organization), and 2) whether network metrics from these two networks  
247 predicted biomarkers of inflammation.

248           First, we compared multiplex and uniplex affiliation networks, which were treated as  
249 weighted and directed networks, to determine if they exhibited differences in key structural

250 features of rhesus relationships. For example, evidence suggests that despotic macaques such as  
251 rhesus, particularly in large groups, are likely to have grooming networks that are modular (i.e.,  
252 shows subgrouping), expected to be based on kinship, and have individual network positions  
253 (i.e., eigenvector centrality) that are correlated with rank<sup>55,56</sup>. Therefore, we examined whether  
254 these two networks differed in the degree of clustering (Newman's modularity, clustering  
255 coefficient), kin bias (e.g., proportion of kin (kin unweighted degree/total unweighted degree)),  
256 and associations with rank (proportion of grooming up the hierarchy, rank disparity among  
257 grooming dyads) for each of the four groups studied. Also, because previous research has  
258 focused on bond strength, we further examined reciprocity, strength of relationships (average  
259 edge weight), and distribution of grooming (eigenvector centralization) across these network  
260 types. Due to the low number of groups in the comparison, paired t-tests were used to evaluate if  
261 the multidimensional vs unidimensional network metrics were consistently different across  
262 groups. Normality of the differences was evaluated using the Shapiro-Wilk test, and if  
263 significant then Wilcoxon signed rank tests were used. As a final structural analysis, we  
264 examined the correlations between individual level network positions from these two network  
265 types (Table S2) to evaluate multicollinearity within networks and associations between  
266 networks.

267       Next, to determine if the structure of individual affiliative relationships in multiplex or  
268 uniplex affiliation networks was associated with pro-inflammatory cytokines we ran generalized  
269 linear models using a negative binomial distribution (proc glimmix, SAS 9.4) on each biomarker  
270 separately (see <sup>22</sup> for details on distribution choice and Figure S2 for distributions). For these  
271 analyses networks were treated as weighted but undirected. Model building proceeded in four  
272 steps for each outcome (i.e., IL-6, TNF- $\alpha$ ). One animal was excluded from the IL-6 analysis

273 because it was an outlier with influence (Cook's  $D > 1$ ); all other outliers had a Cook's  $D < 0.5$   
274 and therefore were included in the analyses. A second animal was excluded from all analysis  
275 due to the fact she was not included in the uniplex network. For all steps,  $\Delta AIC > 2$  was used to  
276 identify potential predictors and candidate models. First, a random effect indicating the group ID  
277 was evaluated for each outcome, and all subsequent models were compared to this random  
278 effects only model. Next, variables from the literature (age, dominance rank, dominance  
279 certainty, sampling order), although not of direct interest here, were evaluated to determine if it  
280 was necessary to control for their effects on inflammation before examining social network  
281 variables. Third, a statistical winnowing strategy was used to eliminate nonpredictive social  
282 network variables (multiplex affiliation, uniplex affiliation, or huddling metrics) from further  
283 consideration<sup>56</sup>. Because huddling behavior was used to separate relationships into the multiplex  
284 and uniplex networks, huddling degree was also included as a potential predictor to evaluate if it  
285 was multiplex vs uniplex relationships or just simply huddling behavior driving observed effects.  
286 While some multiplex affiliation and huddling metrics were highly correlated (Table S2), VIF  
287 (range: 1.93 – 1.94) and tolerance (range: 0.517 – 0.519) did not indicate multicollinearity. A  
288 final set of models was constructed in which variables identified in step 3 were combined to  
289 identify a final set of candidate models. Metrics from the same network were never included in  
290 the same model due to the interdependence of network metrics. If no single best model emerged,  
291 candidate models (i.e., those with  $\Delta AIC \leq 2$ , Table S3) are discussed with model weights guiding  
292 our interpretations<sup>57</sup>. A log of all models tested is available in Tables S3-5.

### 293 **Ethical Note**

294 All procedures used in this study met all legal requirements of the United States as well  
295 as guidelines set by the American Society of Primatologists regarding the ethical treatment of

296 non-human primates. This study was approved by the Institutional Care and Use Committee at  
297 the University of California, Davis and was carried out in compliance with the ARRIVE  
298 guidelines.

## 299 **Results**

### 300 *Multiplex vs. Uniplex Affiliation Networks*

301 For all groups studied, clear differences in network topology, kinship, and associations  
302 with dominance rank were seen between the multiplex (groom and huddle, Figure 1A) and  
303 uniplex (grooming only, Figure 1B) affiliative networks (Table 3). Multiplex affiliation networks  
304 had higher average edge-weight ( $t(3) = 4.32, p = 0.023$ ; the average number of interactions per  
305 social partner), clustering coefficient ( $t(3) = 8.74, p = 0.003$ ), and modularity ( $t(3) = 6.74, p =$   
306  $0.007$ ; how much clustering is in the network) for all groups. Notably, although average edge-  
307 weights in the multiplex networks were higher than uniplex networks, the predominant edge  
308 weight in both networks was 1-2 grooming interactions (Figure S1). Multiplex affiliation  
309 networks also consistently showed more kin bias (proportion kin,  $t(3) = 5.74, p = 0.010$ ) and  
310 reciprocity ( $t(3) = 6.83, p = 0.006$ ) than uniplex networks. In contrast, both networks showed  
311 associations between rank and affiliation (i.e., no difference in the tendency for grooming to be  
312 directed up the hierarchy (Shapiro-Wilk:  $W = 0.761, p = 0.048$ ; Wilcoxon signed rank  $v = 0, p =$   
313  $0.125$ ) or eigenvector centrality to be correlated with rank ( $t(3) = -0.741, p = 0.51$ )) but the  
314 disparity in the ranks of the grooming partners was greater in the uniplex affiliation networks  
315 compared to the multiplex networks ( $t(3) = -10.534, p = 0.002$ ). Individual centrality metrics  
316 generated from the multiplex networks were largely uncorrelated with metrics from the uniplex  
317 networks (mean correlation strength = 0.15, SD = 0.10, Table S2).

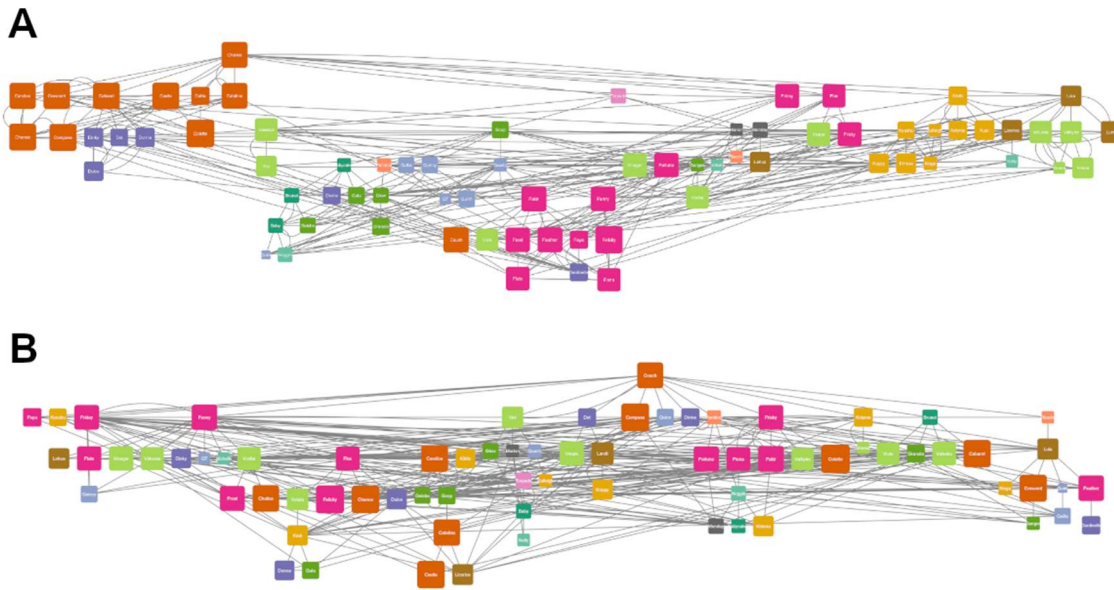

319 Figure 1. Example network graphs of (A) Multiplex affiliative network and (B) Uniplex  
 320 affiliative network from social group A. Node color corresponds to matriline membership. Node  
 321 size corresponds to rank (large nodes are high ranking). Curved lines reflect reciprocal edges.  
 322 Layout is yFiles Tree Layout, Cytoscape.

323 **Table 3: Network Level Metrics by Group**

| Group                                      | <u>A</u> |       | <u>B</u> |       | <u>C</u> |       | <u>D</u> |       | Effect                   |
|--------------------------------------------|----------|-------|----------|-------|----------|-------|----------|-------|--------------------------|
|                                            | Multi    | Uni   | Multi    | Uni   | Multi    | Uni   | Multi    | Uni   |                          |
| Density                                    | 0.062    | 0.067 | 0.087    | 0.063 | 0.088    | 0.099 | 0.047    | 0.086 | Multi = Uni              |
| Modularity                                 | 0.688    | 0.272 | 0.515    | 0.281 | 0.473    | 0.219 | 0.698    | 0.290 | Multi > Uni*             |
| Eigenvector<br>Centralization              | 0.807    | 0.654 | 0.659    | 0.589 | 0.710    | 0.636 | 0.829    | 0.538 | Multi > Uni <sup>+</sup> |
| Avg Edge Weight                            | 4.074    | 1.480 | 2.834    | 1.400 | 2.215    | 1.445 | 3.643    | 1.471 | Multi > Uni*             |
| Clustering<br>Coefficient                  | 0.269    | 0.157 | 0.249    | 0.147 | 0.270    | 0.201 | 0.261    | 0.185 | Multi > Uni*             |
| Reciprocity                                | 0.534    | 0.239 | 0.466    | 0.200 | 0.400    | 0.233 | 0.573    | 0.215 | Multi > Uni*             |
| Proportion Kin                             | 0.617    | 0.165 | 0.207    | 0.000 | 0.638    | 0.260 | 0.695    | 0.171 | Multi > Uni*             |
| Proportion Up Rank <sup>a</sup>            | 0.552    | 0.605 | 0.585    | 0.646 | 0.577    | 0.671 | 0.563    | 0.616 | Multi = Uni              |
| Rank Disparity                             | 0.154    | 0.251 | 0.232    | 0.301 | 0.155    | 0.240 | 0.140    | 0.249 | Multi < Uni*             |
| Rank/Eigenvector<br>centrality correlation | 0.101    | 0.488 | 0.488    | 0.328 | 0.386    | 0.181 | -0.230   | 0.308 | Multi = Uni              |

324 Multi: Multidimensional affiliation network; Uni: Unidimensional affiliative network. Effect  
 325 indicates the overall difference between multidimensional and unidimensional networks for all  
 326 groups using a paired t-test. <sup>a</sup> Wilcoxon test. \* p < 0.05, <sup>+</sup> p < 0.1

327 *Relationship Dimensionality and Biomarkers of Inflammation*

328 **IL-6.** The best fit models indicated that an individual’s position in both the multiplex and uniplex  
 329 affiliative networks predicted levels of IL-6. Less connected individuals (i.e., low weighted  
 330 closeness) in the multiplex network had higher levels of IL-6 (Table 4). In contrast, more  
 331 connected individuals (i.e., high weighted closeness or weighted degree) in the uniplex network  
 332 exhibited higher levels of the pro-inflammatory cytokine IL-6. Multiplex weighted closeness was  
 333 not correlated with uniplex weighted degree ( $r = -0.06$ ) but had a weak negative correlation with  
 334 uniplex closeness weight ( $r = -0.23$ ). Uniplex weighted closeness and weighted degree were  
 335 highly correlated ( $r = 0.84$ , Table S2). Effects from the best fit model (Model 1) are shown in  
 336 Figure 2A-B.

337

338 **Table 4: Candidate Model Outputs**

|               | <b>Model Parameters</b>  | <b>Model 1</b>               | <b>Model 2</b>               |
|---------------|--------------------------|------------------------------|------------------------------|
| IL-6          | Multi Weighted Closeness | <b>-1.15</b> (-2.00 – -0.30) | <b>-1.35</b> (-2.19 – -0.51) |
|               | Uni Weighted Closeness   | <b>2.95</b> (1.21 – 4.69)    | -                            |
|               | Uni Weighted Degree      | -                            | <b>0.041</b> (0.016 – 0.066) |
|               | Intercept                | 1.14 (-1.28 – 3.56)          | <b>2.72</b> (1.38 – 4.07)    |
|               | AIC                      | 1520.65                      | 1520.77                      |
| TNF- $\alpha$ | Multi Weighted Closeness | <b>-2.54</b> (-3.66 – -1.42) | <b>-2.07</b> (-3.22 – -0.93) |
|               | Uni Betweenness          | <b>0.005</b> (0.001 – 0.008) | -                            |
|               | Uni Degree               | -                            | <b>0.07</b> (0.02 – 0.12)    |
|               | Intercept                | <b>6.74</b> (5.19 – 8.30)    | <b>6.03</b> (4.24 – 7.82)    |
|               | AIC                      | 2627.69                      | 2628.74                      |

339  $\beta$  (95% CI). Bold values:  $p < 0.05$ . All models were run using a negative binomial distribution

340 and included a random effect of group. Multi: Multiplex affiliation network, Uni: Uniplex

341 affiliation network.

342



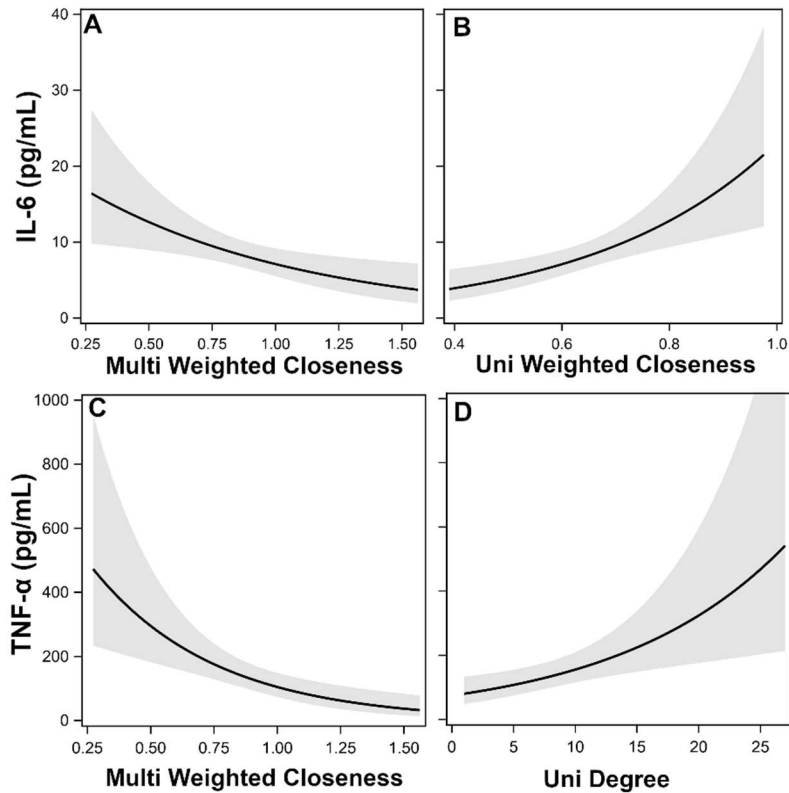

Figure 2. Effects of affiliative centrality on cytokines. Effects of multiplex (Multi) weighted closeness (A) and uniplex (Uni) weighted closeness (B) on levels of IL-6 with 95% confidence intervals (Model 1). Effects of multiplex weighted closeness (C) and uniplex degree (D) on levels of TNF $\alpha$  with 95% confidence intervals (Model 2).

354

355

356

357 **TNF- $\alpha$ .** Levels of TNF- $\alpha$  were also predicted by network position in both the multiplex and  
358 uniplex affiliation networks. As with IL-6, lower connectedness (i.e., weighted closeness) in the  
359 multiplex grooming network and greater connectivity (i.e., betweenness or degree) in the uniplex  
360 affiliation network were associated with higher levels of TNF- $\alpha$  (Table 4). Multiplex weighted  
361 closeness was not correlated with uniplex degree ( $r = -0.08$ ) but had a weak positive correlation  
362 with uniplex betweenness ( $r = 0.20$ ). Uniplex betweenness and degree were highly correlated ( $r =$   
363  $0.79$ , Table S2). Examination of the effects in the best fit model (Model 1) containing multiplex  
364 weighted closeness and uniplex betweenness revealed unexpectedly high predicted values of  
365 TNF- $\alpha$  (i.e., higher than 99% of the sample) and large confidence intervals. This is likely due to  
366 low variability in multiplex weighted closeness at high levels of uniplex betweenness (Figure

367 S3). Therefore, we show effects of the second-best model (Model 2) containing multiplex  
368 weighted closeness and uniplex degree in Figure 2C-D.

## 369 **Discussion**

370 Social primates have a complex web of differentiated social relationships, which vary in  
371 their structure and function. While strong affiliative social relationships are usually associated  
372 with better health, less is known on how the multidimensionality or diversity of affiliative  
373 behaviors exhibited in social relationships might impact health. We identified affiliative  
374 relationships that were multiplex (animals affiliated using both grooming and huddling behavior)  
375 versus uniplex (animals only groomed). Examination of these networks revealed that they  
376 differed in topology, kinship, and associations with rank. Multiplex networks were more  
377 modular, clustered, reciprocal, had higher average edge weights, were more strongly associated  
378 with kinship, and less likely to be related to dominance rank than were uniplex affiliative  
379 networks. The health impacts of these two networks differed as well, with females that were *less*  
380 socially embedded in multiplex affiliative networks exhibiting higher levels of biomarkers of  
381 inflammation (IL-6 and TNF- $\alpha$ ), whereas females *more* socially connected in uniplex networks  
382 exhibited higher levels of biomarkers of inflammation. These results suggest that grooming  
383 which occurs in the context of multiplex affiliative relationships may result in health benefits  
384 (i.e., reduced inflammation) while grooming occurring in uniplex affiliative relationships may  
385 have potential costs.

386 Networks consisting of dyads with multiplex affiliative relationships showed differences  
387 from uniplex affiliative networks in network topology, kinship, and associations with dominance.  
388 Multiplex networks had structural characteristics consistent with strong bonds or supportive  
389 affiliative relationships<sup>13,58,59</sup>. Specifically, interactions in the multiplex networks were more

390 likely to be reciprocal, frequent (i.e., higher edge-weight), clustered, and associated with kinship,  
391 suggesting they are relationships that are regularly maintained and potentially more stable across  
392 time<sup>13,59</sup>. Previous methods demonstrating that strong bonds enhance fitness, particularly those  
393 using sociality indices, have also used multiple behaviors to assess relationship strength (e.g.,  
394 grooming and proximity<sup>7,17,18</sup>). However, these methods rely on total duration or frequency of  
395 affiliation to describe relationships rather than characterizing the breadth or dimensionality of the  
396 relationships (e.g., dyads can have high DSI through grooming, proximity, or both). Similar to  
397 strong bonds, multiplex affiliative relationships may improve health and fitness by buffering  
398 individuals from the negative impacts of stress, improving predator detection, promoting  
399 offspring survival, and improving social stability<sup>10,11,60,61</sup>.

400         Also consistent with the literature on strong affiliative bonds, being well connected to  
401 others was associated with biomarkers of better health. Specifically, the negative association  
402 between weighted closeness and biomarkers of inflammation indicated that individuals that were  
403 less embedded in the network (e.g., at the periphery of the group) may be at greater risk for  
404 inflammation related diseases<sup>24</sup>. Closeness measures how close a node is to all other nodes in a  
405 network (i.e., how many edges must be traversed to get to all other nodes) which means that  
406 individuals with high closeness can readily reach many other individuals in the network. In other  
407 words, they are highly embedded in this supportive network. The fact that the weighted version  
408 of closeness was the best predictor suggests that it's not enough to just be highly embedded, but  
409 frequent engagement is also required to reap the benefits of this connectedness. Notably,  
410 huddling degree was not a predictor of inflammation adding support to the idea that there is  
411 something unique about these multiplex relationships that is not represented by looking at  
412 grooming or huddling relationships alone. Our results add to the literature suggesting that strong

413 bonds may improve fitness by altering endocrine and immune function<sup>2,15,62,63</sup>. Consistent with  
414 this idea, Yang et al.<sup>64</sup> found in humans that socially integrated individuals (i.e., those with more  
415 social connections across multiple domains) exhibited lower inflammation, whereas social strain  
416 (e.g., higher levels of family criticism or demands) was associated with greater inflammation.  
417 Given that familial and friend relationships tend to endure through extended periods, often  
418 persisting over decades (in both humans and NHPs), these relationships may have an important  
419 and long-lasting impact on health.

420 Uniplex affiliative relationships may reflect affiliative relationships that are more  
421 transactional in nature<sup>65</sup>. The fact that uniplex relationships are less kin biased but likely to  
422 occur between dyads of more disparate ranks suggests that these relationships may be more  
423 related to grooming being used as a commodity in exchange for tolerance or support from higher  
424 ranking animals. These relationships are likely more transactional in nature, reflecting a desire  
425 to maintain peace/tolerance or used in a biological market exchange<sup>48,49</sup>, rather than reflecting a  
426 strong affiliative relationship. The positive association between females' connectedness in  
427 uniplex affiliation networks and biomarkers of inflammation suggests that uniplex affiliative  
428 relationships may not be supportive on their own and instead are associated with increased  
429 physiological costs, at least in the short term. Specifically, predictors of inflammation in the  
430 uniplex affiliation networks included degree, weighted degree, weighted closeness, and  
431 betweenness. The network metrics in the uniplex network were more highly correlated with each  
432 other and therefore it is difficult to identify which specific aspect of centrality in the network  
433 might be driving these effects. However, collectively this group of candidate predictors indicates  
434 that greater general connectedness (direct and indirect) was associated with increased  
435 inflammation. Uniplex affiliative relationships are maintained through generally less frequent

436 interactions that are more likely to occur between animals of disparate ranks which may result in  
437 greater uncertainty regarding the outcome of any given interaction. This uncertainty may be  
438 stressful, and therefore have at least short-term physiological costs<sup>66</sup>. If these relationships are  
439 more transactional in nature, reflecting a desire to maintain peace/tolerance or used in a  
440 biological market exchange<sup>48,49</sup>, then maintaining more of these transactional relationships may  
441 result in increased stress, which if sustained can result in long-term physiological costs<sup>2</sup>. It is  
442 possible that these short-term costs are actually investments that may manifest in future benefits  
443 (e.g., tolerance, alliance support) that would offset these costs, yet this is difficult to test as the  
444 “commodities” exchanged may be heterogeneous and the time-scale for market exchanges is  
445 often unclear<sup>67</sup>. However, other work points to benefits of weak or economically based bonds to  
446 survival and reproduction<sup>6,17</sup> (although see<sup>7</sup>). While these types of connections may have  
447 ultimate fitness benefits (e.g., alliance support, increased access to food), this research suggests  
448 they may also be associated with proximate costs.

## 449 **Conclusion**

450 Both humans and many species of NHPs engage in a complex interconnected system of  
451 social interactions. Understanding the mechanisms by which social relationships impact health  
452 and fitness remains a challenge. Decades of research has established that affiliative social  
453 relationships can benefit health, however, the complexity and multidimensionality of  
454 relationships has yet to be explored. By utilizing a network approach, we were able to  
455 characterize two types of affiliative social relationships that differed in their network topology,  
456 kin bias, associations with rank, and importantly their associations with biomarkers of  
457 inflammation. Our research has indicated that features of multiplex affiliative relationships are  
458 consistent with the concept of a strong supportive relationships and may support health and

459 fitness. In contrast, more transactional affiliative relationships (e.g., uniplex affiliation) may  
460 incur short-term health costs yet may result in ultimate benefits through commodity exchange.  
461 Still unclear is whether these effects are specific to the combination of behaviors used here (i.e.,  
462 huddling and grooming), or if other affiliative behaviors (e.g., proximity) might provide similar  
463 information. Further research into the dimensionality of relationships might reflect different  
464 qualities or functions of relationships is needed. However, this complexity is important to  
465 consider for understanding the mechanisms underlying the impact of social relationships on  
466 human and NHP health.

467

## 468 **Acknowledgements**

469 We thank the data collection team: A. Barnard, T. Boussina, E. Cano, H. Caparella, C.  
470 Carminito, J. Greco, M. Jackson, A. Maness, S. Seil, N. Sharpe, A. Vitale, & S. Winkler. This  
471 research was funded by an NIH grant awarded to BM (R01-HD068335) and the California  
472 National Primate Research Center base grant (P51-OD01107-53). This is an updated version of  
473 a manuscript on the PeerJ preprint server (<https://doi.org/10.7287/peerj.preprints.27961v1>).

474

475

476

477

478 **References**

- 479 1. Holt-Lunstad, J., Smith, T. B. & Layton, J. B. Social relationships and mortality risk: A  
480 meta-analytic review. *PLoS Medicine* **7**, (2010).
- 481 2. Snyder-Mackler, N. *et al.* Social determinants of health and survival in humans and other  
482 animals. *Science* **368**, (2020).
- 483 3. Berkman, L. F., Glass, T., Brissette, I. & Seeman, T. E. From social integration to health:  
484 Durkheim in the new millennium. *Soc. Sci. Med.* **51**, 843–857 (2000).
- 485 4. Ostner, J. & Schülke, O. Linking Sociality to Fitness in Primates: A Call for Mechanisms.  
486 *Adv. Study Behav.* **50**, 127–175 (2018).
- 487 5. Archie, E. A., Tung, J., Clark, M., Altmann, J. & Alberts, S. C. Social affiliation matters: both  
488 same-sex and opposite-sex relationships predict survival in wild female baboons. *Proc*  
489 *Biol Sci* **281**, (2014).
- 490 6. Ellis, S., Snyder-Mackler, N., Ruiz-Lambides, A., Platt, M. L. & Brent, L. J. N.  
491 Deconstructing sociality: the types of social connections that predict longevity in a group-  
492 living primate. *Proc. R. Soc. B Biol. Sci.* **286**, 20191991 (2019).
- 493 7. Silk, J. B., Seyfarth, R. M. & Cheney, D. L. Quality versus quantity: do weak bonds enhance  
494 the fitness of female baboons? *Anim. Behav.* **140**, 207–211 (2018).
- 495 8. Lehmann, J., Majolo, B. & McFarland, R. The effects of social network position on the  
496 survival of wild Barbary macaques, *Macaca sylvanus*. *Behav. Ecol.* **27**, 20–28 (2016).
- 497 9. Mendes de Leon, C. F. *et al.* Social Networks and Disability Transitions Across Eight

- 498 Intervals of Yearly Data in the New Haven EPESE. *Journals Gerontol. Ser. B Psychol. Sci.*  
499 *Soc. Sci.* **54B**, S162–S172 (1999).
- 500 10. Cheney, D. L., Silk, J. B. & Seyfarth, R. M. Network connections, dyadic bonds and fitness  
501 in wild female baboons. *R. Soc. Open Sci.* **3**, 160255 (2016).
- 502 11. Balasubramaniam, K., Beisner, B., Vandeleest, J., Atwill, E. & McCowan, B. Social  
503 buffering and contact transmission: network connections have beneficial and  
504 detrimental effects on *Shigella* infection risk among captive rhesus macaques. *PeerJ*  
505 **2016**, e2630 (2016).
- 506 12. Brent, L. J. N. *et al.* Genetic origins of social networks in rhesus macaques. *Sci. Reports*  
507 *2013 31* **3**, 1–8 (2013).
- 508 13. Silk, J. B. *et al.* Female chacma baboons form strong, equitable, and enduring social  
509 bonds. *Behav. Ecol. Sociobiol.* **64**, 1733 (2010).
- 510 14. Silk, J. B. Evolutionary Perspectives on the Links Between Close Social Bonds, Health, and  
511 Fitness. (2014).
- 512 15. Crockford, C. *et al.* Urinary oxytocin and social bonding in related and unrelated wild  
513 chimpanzees. *Proc. R. Soc. B Biol. Sci.* **280**, 20122765 (2013).
- 514 16. Thompson, N. A. & Cords, M. Stronger social bonds do not always predict greater  
515 longevity in a gregarious primate. *Ecol. Evol.* **8**, 1604–1614 (2018).
- 516 17. McFarland, R. *et al.* The ‘strength of weak ties’ among female baboons: fitness-related  
517 benefits of social bonds. *Anim. Behav.* **126**, 101–106 (2017).
- 518 18. Fischer, J., Farnworth, M. S., Sennhenn-Reulen, H. & Hammerschmidt, K. Quantifying  
519 social complexity. *Anim. Behav.* **130**, 57–66 (2017).



- 520 19. Schülke, O., Wenzel, S. & Ostner, J. Paternal Relatedness Predicts the Strength of Social  
521 Bonds among Female Rhesus Macaques. *PLoS One* **8**, e59789 (2013).
- 522 20. Hinde, R. A. ON DESCRIBING RELATIONSHIPS\*. *J. Child Psychol. Psychiatry* **17**, 1–19  
523 (1976).
- 524 21. Silk, J. B., Cheney, D. & Seyfarth, R. A practical guide to the study of social relationships.  
525 *Evol. Anthropol.* **22**, 213–225 (2013).
- 526 22. Vandeleest, J. J. *et al.* Decoupling social status and status certainty effects on health in  
527 macaques: a network approach. *PeerJ* (2016). doi:10.7717/peerj.2394
- 528 23. Vandeleest, J. J. *et al.* Sex differences in the impact of social status on hair cortisol  
529 concentrations in rhesus monkeys (*Macaca mulatta*). *Am. J. Primatol.* (2019).  
530 doi:10.1002/ajp.23086
- 531 24. Bruunsgaard, H. *et al.* Predicting death from tumour necrosis factor-alpha and  
532 interleukin-6 in 80-year-old people. *Clin. Exp. Immunol.* **132**, 24–31 (2003).
- 533 25. Gan, W. Q., Man, S. F. P., Senthilselvan, A. & Sin, D. D. Association between chronic  
534 obstructive pulmonary disease and systemic inflammation: a systematic review and a  
535 meta-analysis. *Thorax* **59**, 574–580 (2004).
- 536 26. Holmes, C. *et al.* Systemic inflammation and disease progression in Alzheimer disease.  
537 *Neurology* **73**, 768–774 (2009).
- 538 27. Friedman, E. M. *et al.* Social relationships, sleep quality, and interleukin-6 in aging  
539 women. *Proc. Natl. Acad. Sci. U. S. A.* **102**, 18757–18762 (2005).
- 540 28. Marucha, P. T., Crespín, T. R., Shelby, R. A. & Andersen, B. L. TNF- $\alpha$  levels in cancer  
541 patients relate to social variables. *Brain. Behav. Immun.* **19**, 521–525 (2005).

- 542 29. Uchino, B. N., Vaughn, A. A., Carlisle, M. & Birmingham, W. Social Support and Immunity.  
543 in *The Oxford Handbook of Psychoneuroimmunology* (Oxford University Press, 2012).  
544 doi:10.1093/oxfordhb/9780195394399.013.0012
- 545 30. Capitano, J. P., Cacioppo, S. & Cole, S. W. Loneliness in monkeys: neuroimmune  
546 mechanisms. *Current Opinion in Behavioral Sciences* **28**, 51–57 (2019).
- 547 31. *Macaque Societies: A Model for the Study of Social Organization*. (Cambridge University  
548 Press, 2004).
- 549 32. Berman, C. M. Early agonistic experience and rank acquisition among free-ranging infant  
550 rhesus monkeys. *Int. J. Primatol.* **1**, 153–170 (1980).
- 551 33. Fushing, H., McAssey, M. P., Beisner, B. & McCowan, B. Ranking network of a captive  
552 rhesus macaque society: a sophisticated corporative kingdom. *PLoS One* **6**, e17817  
553 (2011).
- 554 34. Georgiev, A. V. *et al.* Breaking the succession rule: the costs and benefits of an alpha-  
555 status take-over by an immigrant rhesus macaque on Cayo Santiago. *Behaviour* **153**,  
556 325–351 (2016).
- 557 35. Chapais, B., Girard, M. & Primi, G. Non-kin alliances, and the stability of matrilineal  
558 dominance relations in Japanese macaques. *Anim. Behav.* **41**, 481–491 (1991).
- 559 36. Schulke, O., Bhagavatula, J., Vigilant, L. & Ostner, J. Social bonds enhance reproductive  
560 success in male macaques. *Curr Biol* **20**, 2207–2210 (2010).
- 561 37. Drickamer, L. C. Quantitative observations of grooming behavior in free-ranging *Macaca*  
562 *mulatta*. *Primates* **17**, 323–335 (1976).
- 563 38. Brent, L. J. N., Ruiz-Lambides, A. & Platt, M. L. Persistent social isolation reflects identity

- 564 and social context but not maternal effects or early environment. *Sci. Rep.* **7**, 1–11  
565 (2017).
- 566 39. Snyder-Mackler, N. *et al.* Social status alters immune regulation and response to  
567 infection in macaques. *Science (80-. )*. **354**, 1041–1045 (2016).
- 568 40. Brent, L. J. N., Ruiz-Lambides, A. & Platt, M. L. Family network size and survival across the  
569 lifespan of female macaques. *Proc. R. Soc. B Biol. Sci.* **284**, (2017).
- 570 41. Balasubramaniam, K. *et al.* Social network community structure and the contact-  
571 mediated sharing of commensal *E. coli* among captive rhesus macaques (*Macaca*  
572 *mulatta*). *PeerJ* **6**, e4271 (2018).
- 573 42. Fujii, K. *et al.* Perc: Using Percolation and Conductance to Find Information Flow  
574 Certainty in a Direct Network. (2016).
- 575 43. Pallante, V., Ferrari, P. F., Gamba, M. & Palagi, E. Embracing in a Female-Bonded Monkey  
576 Species (*Theropithecus gelada*). *J. Comp. Psychol.* **133**, 442–451 (2019).
- 577 44. Aureli, F. & Schaffner, C. M. Aggression and conflict management at fusion in spider  
578 monkeys. *Biol. Lett.* **3**, 147–149 (2007).
- 579 45. Sussman, R. W., Garber, P. A. & Cheverud, J. M. Importance of cooperation and affiliation  
580 in the evolution of primate sociality. *Am. J. Phys. Anthropol.* **128**, 84–97 (2005).
- 581 46. Dunbar, R. I. M. Functional Significance of Social Grooming in Primates. *Folia Primatol.*  
582 **57**, 121–131 (1991).
- 583 47. Lehmann, J., Korstjens, A. H. & Dunbar, R. I. M. Group size, grooming and social cohesion  
584 in primates. *Anim. Behav.* **74**, 1617–1629 (2007).
- 585 48. Borgeaud, C. & Bshary, R. Wild Vervet Monkeys Trade Tolerance and Specific Coalitionary

- 586 Support for Grooming in Experimentally Induced Conflicts. *Curr. Biol.* **25**, 3011–3016  
587 (2015).
- 588 49. Schino, G. & Aureli, F. Grooming reciprocation among female primates: A meta-analysis.  
589 *Biol. Lett.* **4**, 9–11 (2008).
- 590 50. Snyder-Mackler, N. *et al.* Social status drives social relationships in groups of unrelated  
591 female rhesus macaques. *Anim. Behav.* **111**, 307–317 (2016).
- 592 51. Campbell, L. A. D., Tkaczynski, P. J., Lehmann, J., Mouna, M. & Majolo, B. Social  
593 thermoregulation as a potential mechanism linking sociality and fitness: Barbary  
594 macaques with more social partners form larger huddles. *Sci. Rep.* **8**, 1–8 (2018).
- 595 52. Shannon, P. *et al.* Cytoscape: A software Environment for integrated models of  
596 biomolecular interaction networks. *Genome Res.* **13**, 2498–2504 (2003).
- 597 53. Tang, Y., Li, M., Wang, J., Pan, Y. & Wu, F. X. CytoNCA: A cytoscape plugin for centrality  
598 analysis and evaluation of protein interaction networks. *BioSystems* **127**, 67–72 (2015).
- 599 54. Balasubramaniam, K. N. *et al.* The influence of phylogeny, social style, and  
600 sociodemographic factors on macaque social network structure. *Am. J. Primatol.* **80**,  
601 e22727 (2018).
- 602 55. Sueur, C. *et al.* A comparative network analysis of social style in macaques. *Anim. Behav.*  
603 **82**, 845–852 (2011).
- 604 56. Parker, K. J. *et al.* Arginine vasopressin in cerebrospinal fluid is a marker of sociality in  
605 nonhuman primates. *Sci. Transl. Med.* **10**, 9100 (2018).
- 606 57. Burnham, K. P. & Anderson, D. R. *Model Selection and Multimodel Inference: A Practical*  
607 *Information-Theoretic Approach*. (Springer-Verlag, 2002).

- 608 58. Silk, J. B. *et al.* The benefits of social capital: close social bonds among female baboons  
609 enhance offspring survival. *Proc Biol Sci* **276**, 3099–3104 (2009).
- 610 59. Silk, J. B. Looking inside the black box: Mechanisms linking social behavior to health and  
611 fitness. *Evol Anthr.* **23**, 83–84 (2014).
- 612 60. Beisner, B. A., Jackson, M. E., Cameron, A. N. & McCowan, B. Detecting instability in  
613 animal social networks: genetic fragmentation is associated with social instability in  
614 rhesus macaques. *PLoS One* **6**, e16365 (2011).
- 615 61. Micheletta, J. *et al.* Social bonds affect anti-predator behaviour in a tolerant species of  
616 macaque, *Macaca nigra*. *Proc. R. Soc. B Biol. Sci.* **279**, 4042–4050 (2012).
- 617 62. Boccia, M. L. *et al.* Juvenile friends, behavior, and immune responses to separation in  
618 bonnet macaque infants. *Physiol. Behav.* **61**, 191–198 (1997).
- 619 63. Shutt, K., MacLarnon, A., Heistermann, M. & Semple, S. Grooming in Barbary macaques:  
620 Better to give than to receive? *Biol. Lett.* **3**, 231–233 (2007).
- 621 64. Yang, Y. C. *et al.* Social relationships and physiological determinants of longevity across  
622 the human life span. *Proc. Natl. Acad. Sci. U. S. A.* **113**, 578–583 (2016).
- 623 65. Silk, J. B. Using the 'F'-word in primatology. in *Behaviour* **139**, 421–446 (Brill Academic  
624 Publishers, 2002).
- 625 66. Schino, G. & Alessandrini, A. Short-term costs and benefits of grooming in Japanese  
626 macaques. *Primates* **56**, 253–257 (2015).
- 627 67. Dunayer, E. S. & Berman, C. M. Biological markets: theory, interpretation, and proximate  
628 perspectives. A response to Sánchez-Amaro and Amici (2015). *Anim. Behav.* **121**, 131–  
629 136 (2016).



631 Figure Captions

632 Figure 1. Example network graphs of (A) Multiplex affiliative network and (B) Uniplex  
633 affiliative network from social group A. Node color corresponds to matriline  
634 membership. Node size corresponds to rank (large nodes are high ranking). Curved lines  
635 reflect reciprocal edges. Layout is yFiles Tree Layout, Cytoscape.

636

637 Figure 2. Effects of affiliative centrality on cytokines. Effects of multiplex (Multi) weighted  
638 closeness (A) and uniplex (Uni) weighted closeness (B) on levels of IL-6 with 95%  
639 confidence intervals (Model 1). Effects of multiplex weighted closeness (C) and uniplex  
640 degree (D) on levels of TNF $\alpha$  with 95% confidence intervals (Model 2).

641
